# Supplementary material for: A downscaling and bias correction method for climate model ensemble simulations of local-scale hourly precipitation
Source: Research Square preprint supplement (doi:10.21203/rs.3.rs-2601394/v1), 2023-02-28
Supplement: Supplementary file 1 [file a29c7fd02755618be9e870b3.pdf]

1 **Supplementary information**

2

3 **A downscaling and bias correction method for climate model ensemble simulations**

4 **of local-scale hourly precipitation**

5

6 Takao Yoshikane<sup>1\*</sup>, Kei Yoshimura<sup>1</sup>

7

8

9 <sup>1</sup>Institute of Industrial Science, The University of Tokyo, 5-1-5, Kashiwanoha,

10 Kashiwa-shi, Chiba, 277-8574, Japan

11

12

13 \*Corresponding author. Email [takao-y@iis.u-tokyo.ac.jp](mailto:takao-y@iis.u-tokyo.ac.jp)

14

15

16

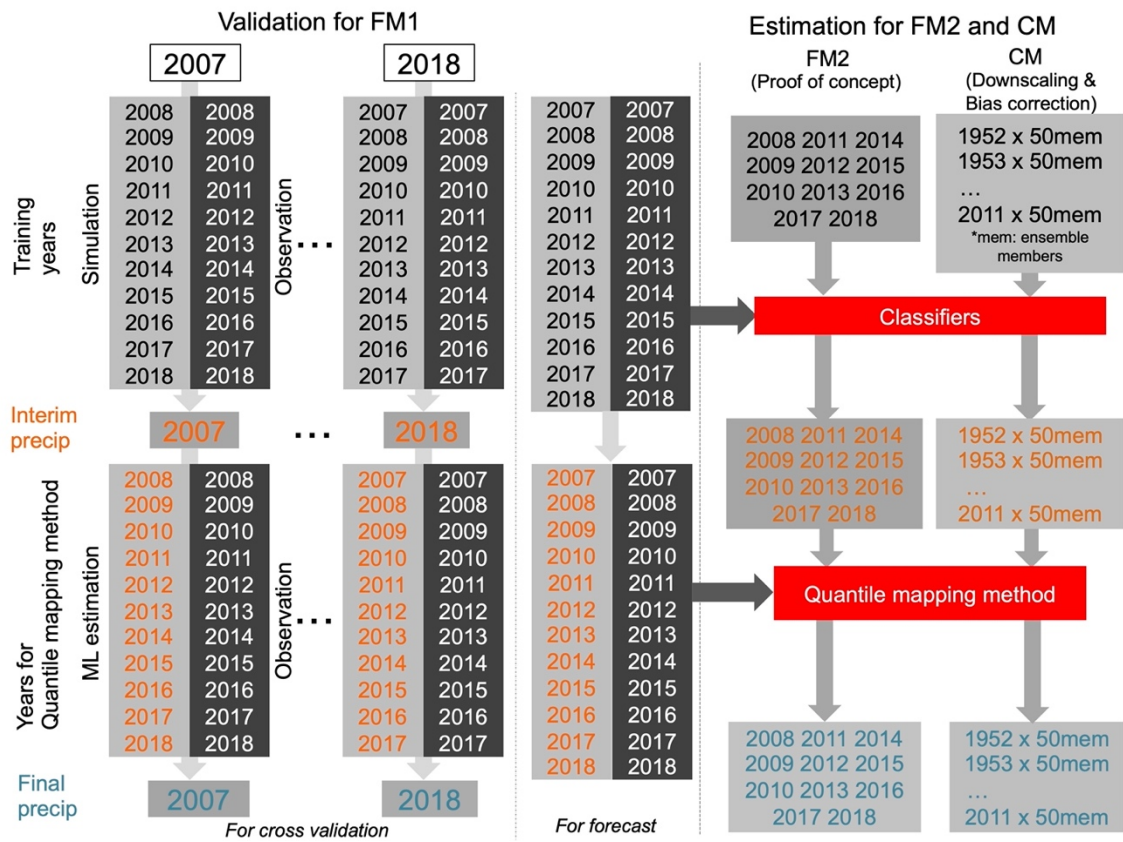

17

18 Fig. S1: Procedure for estimating precipitation using the machine learning-based

19 downscaling method. In the validation of the weather forecast models, the training

20 terms of the simulations (forecast model) and observations (radar data) are from 2007 to

21 2018, excluding the estimation year, and the term for the quantile mapping of the

22 estimated and observed data is from 2008 to 2018, excluding the estimation year. In the

23 application to the climate model outputs, the term for training and quantile mapping is

24 from 2008 to 2018. The d4PDF of the ensemble 1 data (over 60 years) was estimated by

25 the training and quantile mapping.

26

27

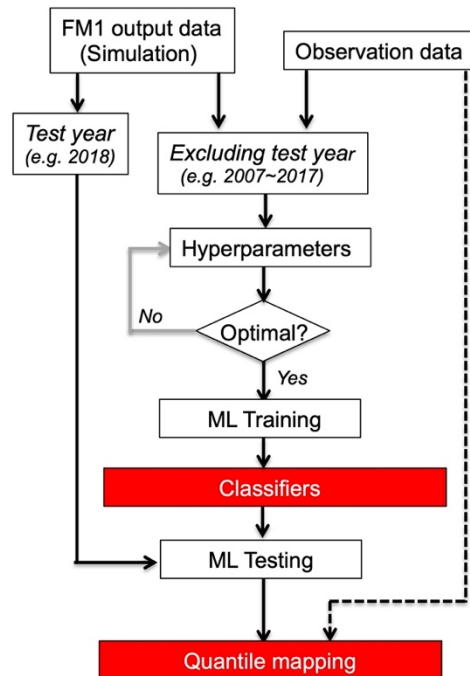

28

29 Fig. S2: Workflow of the downscaling method.

30

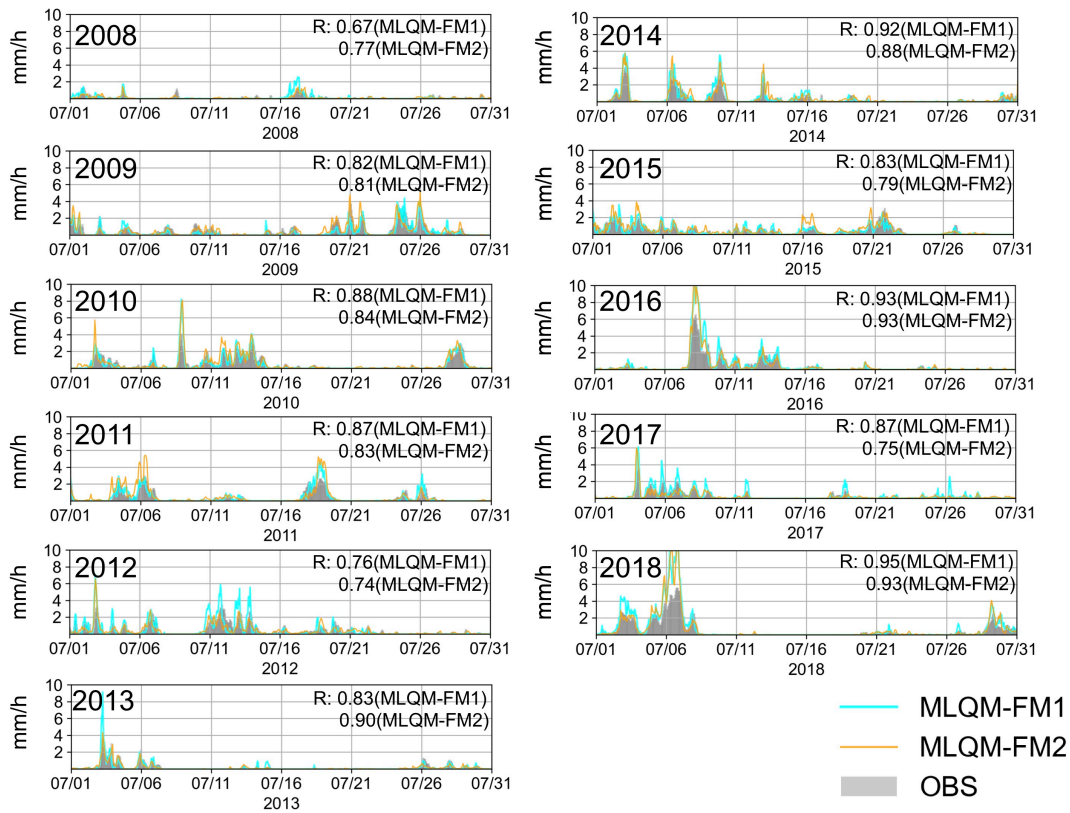

31

32 Fig. S3: Temporal variation in the area-averaged hourly precipitation based on

33 MLQM-FM1, MLQM-FM2, and OBS for July of 2008 to 2018. The bars represent

34 the observations. The blue and orange lines represent the estimated precipitation using

35 MSM-GPV (MLQM-FM1) and GSM-GPV (MLQM-FM2) as the testing data,

36 respectively. The values in the upper right of each graph indicate the correlation

37 coefficient with the observed values

38

39

40

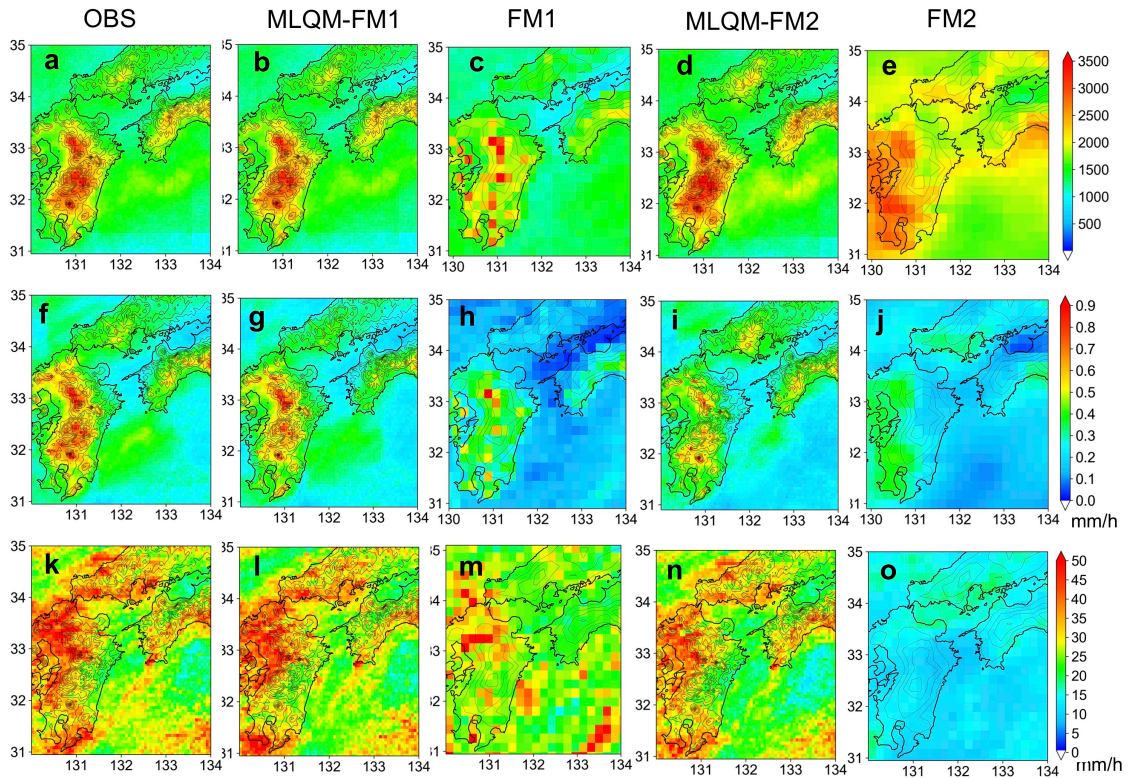

41

42 **Fig. S4: Validation of the spatial distribution of estimated precipitation.**

43 Distributions of precipitation frequency greater than or equal to 1 mm/h for the **a**,

44 observation (OBS), **b**, precipitation estimated using the MSM-GPV (MLQM-FM1), **c**,

45 precipitation simulated using the MSM-GPV (FM1), **d**, precipitation estimated using

46 the GSM-GPV (MLQM-FM2), and **e**, precipitation simulated using the GSM-GPV

47 (FM2). **f**, **g**, **h**, **i**, and **j**, Distributions of monthly precipitation. **k**, **l**, **m**, **n**, and **o**,

48 Distributions of the 99th percentile values of hourly precipitation. The figures were

49 created using Python 3.6.

50

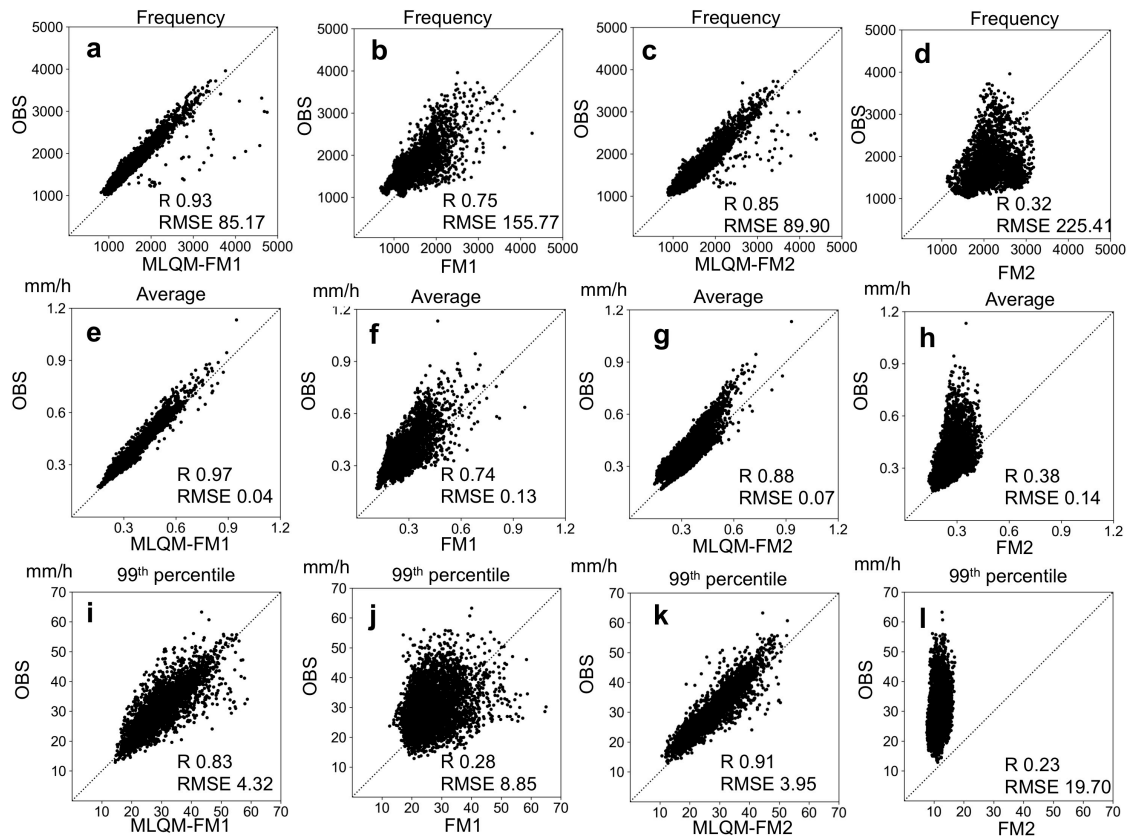

51

52 **Fig. S5: Validation of the machine learning-based downscaling method using**

53 **weather forecast models compared with observations. Relationship of the hourly**

54 **precipitation frequency greater than or equal to 1 mm/h for a, precipitation estimated by**

55 **the MSM-GPV (MLQM-FM1), b, precipitation simulated by the MSM-GPV (FM1), c,**

56 **precipitation estimated by the GSM-GPV (MLQM-FM2), and d, precipitation simulated**

57 **by the GSM-GPV (FM2) with the OBS data. e, f, g, and h, Monthly precipitation. i, j, k,**

58 **and l, 99th percentile values of hourly precipitation. R, correlation coefficient; RMSE,**

59 **root mean square error. The figures were created using Python 3.6.**

60

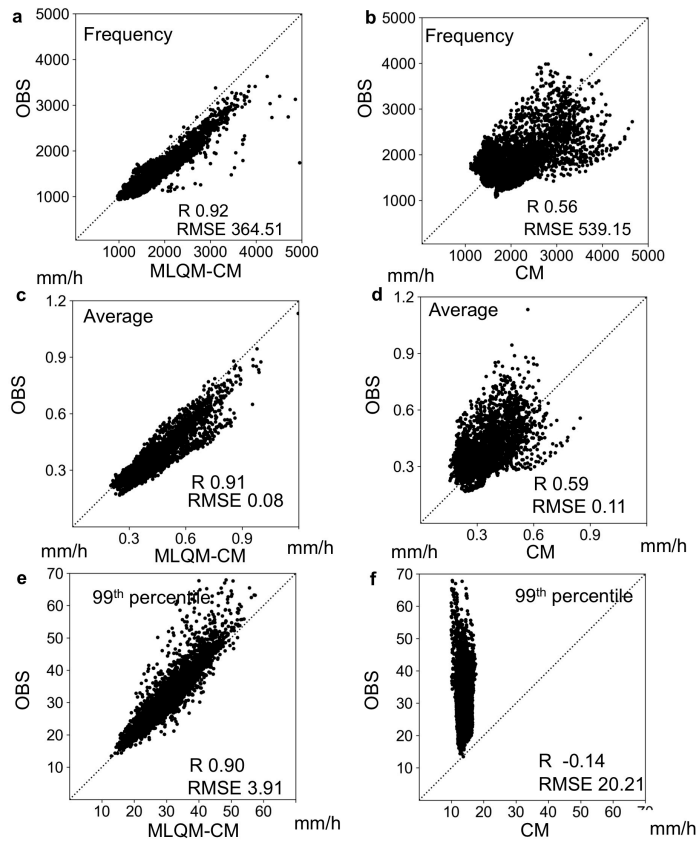

61

62 **Fig. S6: Validation of estimated precipitation.** Relationship of the frequency between

63 observations and **a**, MLQM-CM and **b**, CM. **c and d**, Relationship with monthly

64 precipitation. **e and f**, Relationship with the 99<sup>th</sup> percentile values of hourly

65 precipitation for 1982 to 2011. The OBS data are from 2007 to 2018, and the frequency

66 was adjusted by extending the term 2.5 times.

67

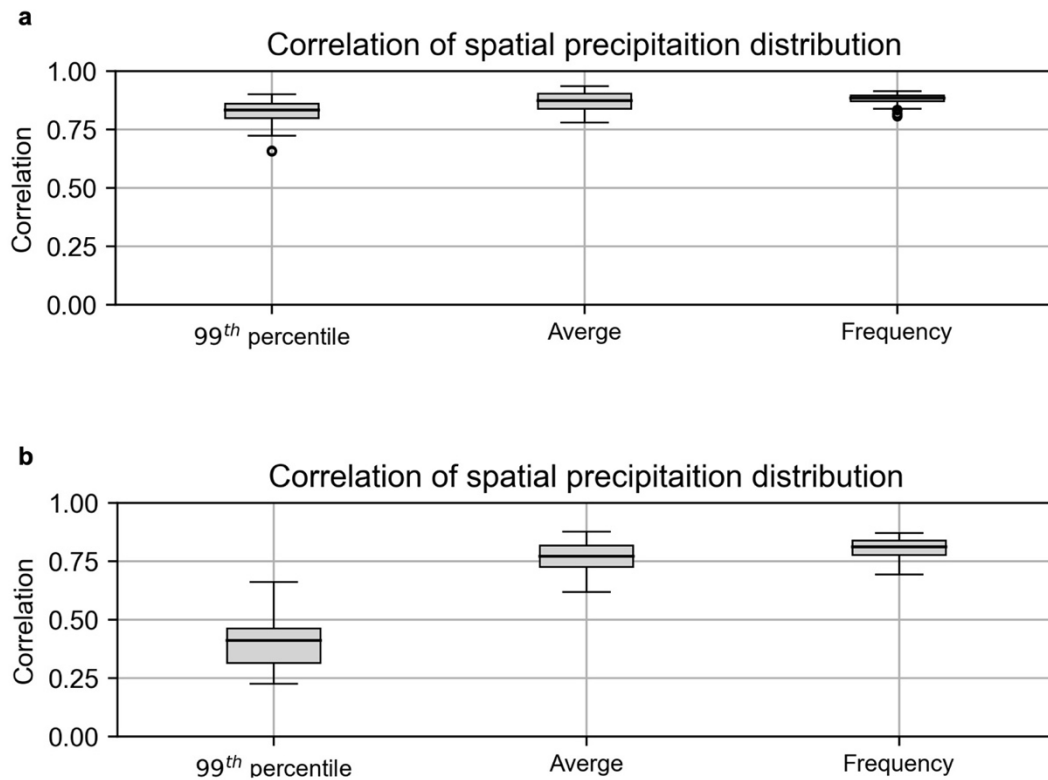

68

69 **Fig. S7: Correlation of spatial distribution of 99<sup>th</sup> percentile, monthly average, and**

70 **frequency of precipitation between observations and 50 ensemble runs in**

71 **MLQM-CM. a, Correlations of the MLQM-CM with OBS. b, Correlations of the**

72 **MLQM-CM with OBS-station.**

73

74

75

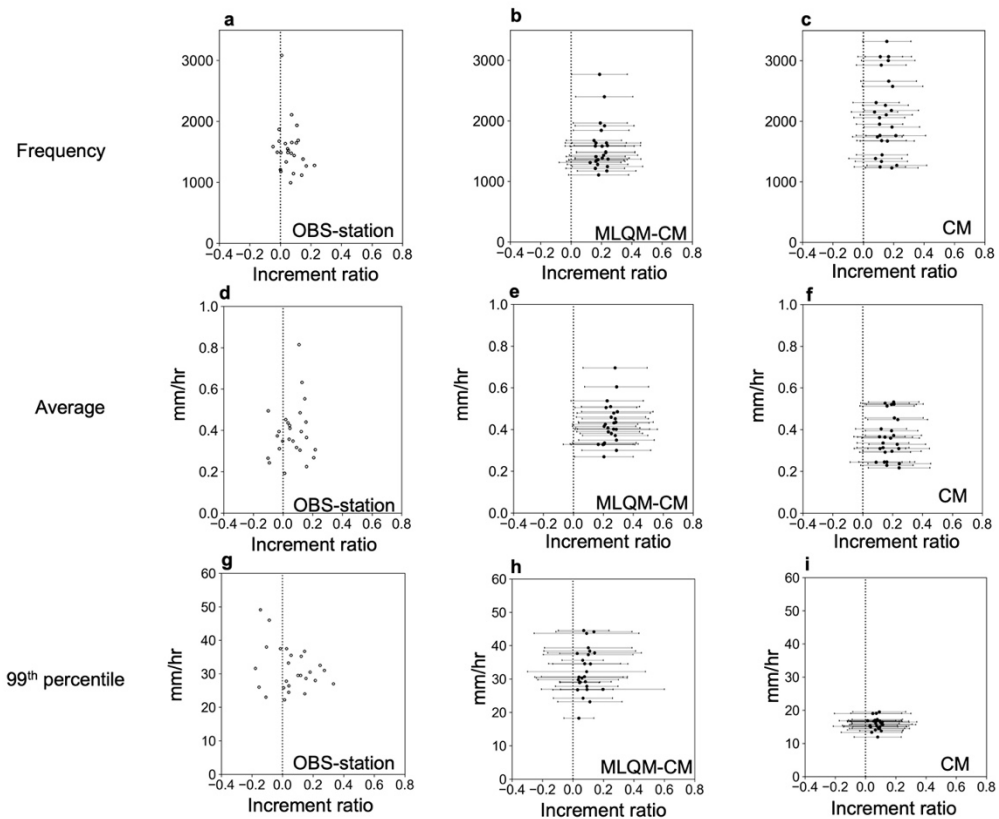

76

77 Fig. S8: Increment ratios of precipitation for 1952–1981 to 1982–2011. Increment

78 ratios of the frequency, monthly average, and 99<sup>th</sup> percentile values of hourly

79 precipitation in **a, d, and g**, OBS-station, **b, e, h**, MLQM-CM, and, **c, f, and i**, CM. The

80 black circle markers indicate the ensemble average. The error bars are the standard

81 deviation of the increment ratio for 50 ensembles.

82

83

84

85

86

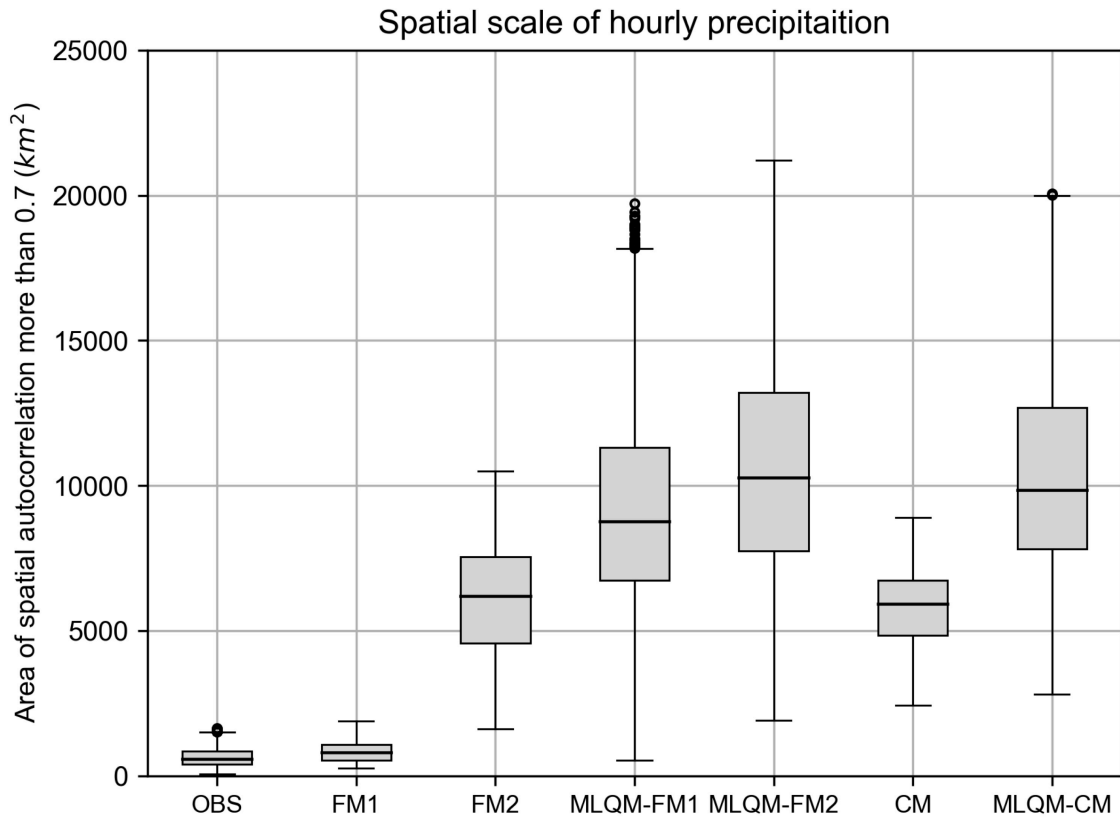

87

88 Fig. S9: **Averaged spatial scale of hourly precipitation.** The number of grid points

89 (0.06°-squared area) with averaged spatiotemporal correlations >0.7.

90

91

92

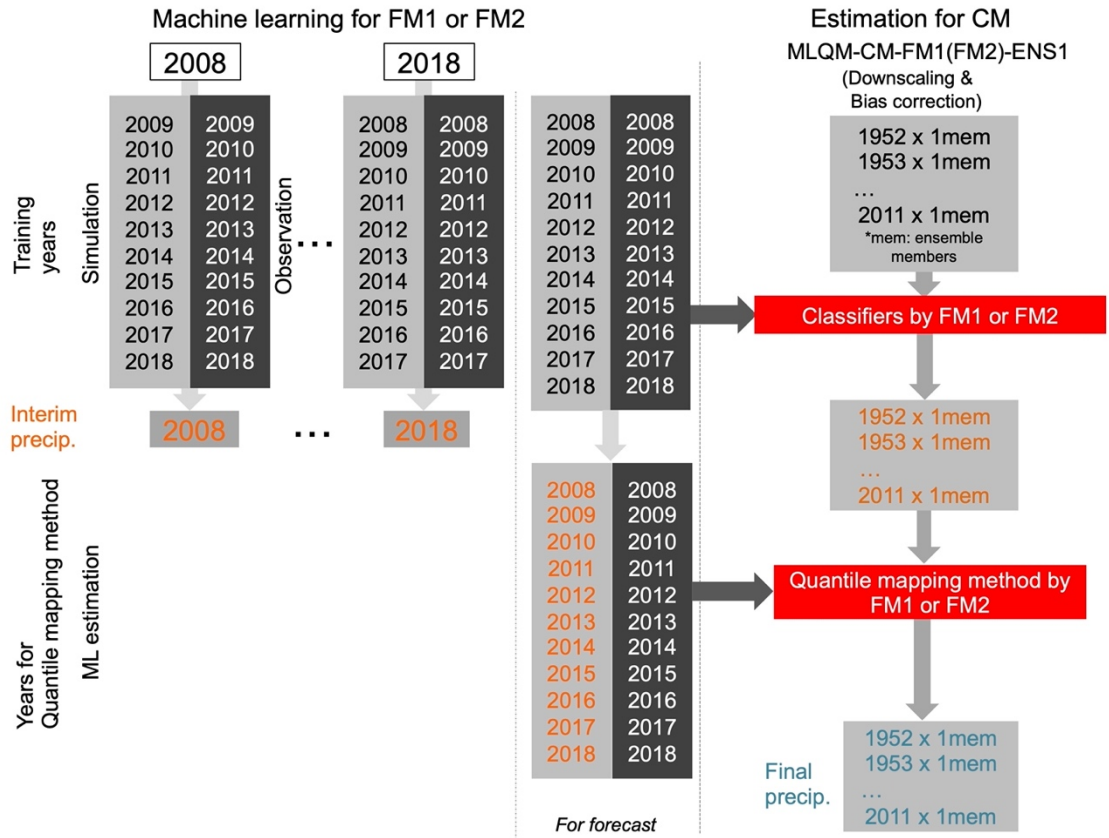

93

94 Fig. S10: Procedure for estimating precipitation using the machine learning-based

95 downscaling method for validation of upscaled data in FM1.

96

97

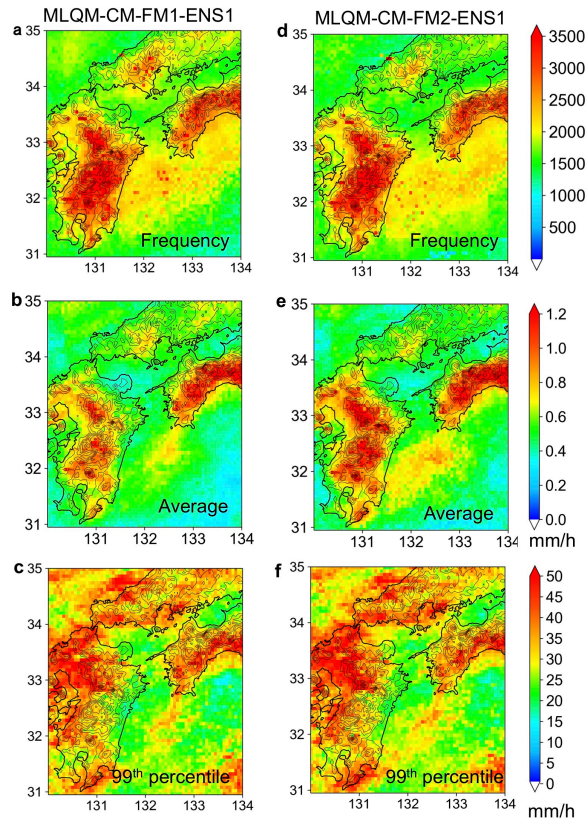

98

99 **Fig. S11: Validation of estimated precipitation using upscaled data. a and d,**

100 Frequency of precipitation greater than or equal to  $1 \text{ mm h}^{-1}$ , **b and e**, monthly mean,

101 and **c and f**, 99<sup>th</sup> percentile values from 1982 to 2011 for MLQM-CM-FM1-ENS1 (left

102 figures) and MLQM-CM-FM1-ENS2 (right figures).

103

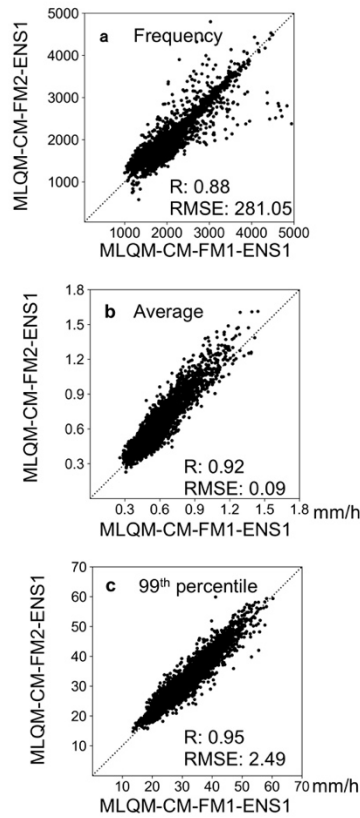

104

105 **Fig. S12: Comparison between precipitation estimated using upscaled data and**

106 **original-resolution data. a,** Precipitation with a frequency greater than or equal to 1

107 mm h<sup>-1</sup>, **b,** monthly mean, and **c,** 99<sup>th</sup> percentile values from 1982 to 2011 for

108 MLQM-CM-FM1-ENS1 and MLQM-CM-FM1-ENS2. R, correlation coefficient;

109 RMSE, root mean square error.

110

111

| Run types            | Training data                               | Testing data                                | Training term | Testing term                                     | Term & data for QM                          |
|----------------------|---------------------------------------------|---------------------------------------------|---------------|--------------------------------------------------|---------------------------------------------|
| MLQM-FM1*            | MSM-GPV<br>(5km →<br>0.18deg :<br>upsaling) | MSM-GPV<br>(5km →<br>0.18deg :<br>upsaling) | 2007 to 2018  | 2007 to 2018<br>(ML estimation1)                 | 2007 to 2018<br>(ML estimation1<br>and OBS) |
| MLQM-FM2             | MSM-GPV<br>(5km →<br>0.18deg :<br>upsaling) | GSM-GPV<br>(20km →<br>0.18deg)              | 2007 to 2018  | 2008 to 2018                                     | 2007 to 2018<br>(ML estimation1<br>and OBS) |
| MLQM-CM              | MSM-GPV<br>(5km →<br>0.18deg :<br>upsaling) | d4PDF_RCM<br>(20km →<br>0.18deg)            | 2007 to 2018  | 1952 to 2011<br>(60 years × 50<br>ensembles)     | 2007 to 2018<br>(ML estimation1<br>and OBS) |
| MLQM-CM-<br>FM1-ENS1 | MSM-GPV<br>(5km →<br>0.18deg :<br>upsaling) | d4PDF_RCM<br>(20km →<br>0.18deg)            | 2008 to 2018  | 1952 to 2011<br>(Ensemble 1)<br>(ML estimation2) | 2008 to 2018<br>(ML estimation2<br>and OBS) |
| MLQM-CM-<br>FM2-ENS1 | GSM-GPV<br>(20km →<br>0.18deg)              | d4PDF_RCM<br>(20km →<br>0.18deg)            | 2008 to 2018  | 1952 to 2011<br>(Ensemble 1)<br>(ML estimation3) | 2008 to 2018<br>(ML estimation3<br>and OBS) |

\* The estimated data from 2008 to 2018 was used for the analysis

112

113 Table S1: **Details of each experiment.**
